# Supplementary material
Source: publisher site journal article supplement (http://www.kjim.org/upload/media/kjim-2019-153-suppl1.pdf)
Supplement: Supplementary file 1 [file kjim-2019-153-suppl1.pdf]

**Supplementary Table 1. Patient characteristics after propensity score matching**

| Characteristic                     | Total data (n = 565) |                 |                 |         | Matched data (n = 268) |               |               |       |
|------------------------------------|----------------------|-----------------|-----------------|---------|------------------------|---------------|---------------|-------|
|                                    | Steroid              | No (n = 161)    | Yes (n = 404)   | p value | SDM                    | No (n = 134)  | Yes (n = 134) | SDM   |
| Sex                                |                      |                 |                 | 0.006   | 0.267                  |               |               | 0.052 |
| Male                               |                      | 122 (75.78)     | 257 (63.61)     |         |                        | 100 (74.63)   | 103 (76.87)   |       |
| Female                             |                      | 39 (24.22)      | 147 (36.39)     |         |                        | 34 (25.37)    | 31 (3.13)     |       |
| Age, yr                            |                      | 63.006 ± 14.626 | 63.114 ± 12.957 | 0.932   | 0.008                  | 63.61 ± 14.46 | 63.77 ± 12.88 | 0.011 |
| Body mass index, kg/m <sup>2</sup> |                      | 22.769 ± 4.604  | 22.529 ± 3.730  | 0.559   | 0.057                  | 22.41 ± 4.34  | 22.40 ± 3.57  | 0.002 |
| Diabetes mellitus                  | No                   | 101 (62.73)     | 282 (69.8)      | 0.105   | 0.150                  | 87 (64.93)    | 84 (62.69)    | 0.047 |
|                                    | Yes                  | 60 (37.27)      | 122 (30.2)      |         |                        | 47 (35.07)    | 50 (37.31)    |       |
| Solid tumor                        | No                   | 103 (63.98)     | 293 (72.52)     | 0.045   | 0.184                  | 89 (66.42)    | 88 (65.67)    | 0.016 |
|                                    | Yes                  | 58 (36.02)      | 111 (27.48)     |         |                        | 45 (33.58)    | 46 (34.33)    |       |
| Cardiovascular disease             | No                   | 149 (92.55)     | 378 (93.56)     | 0.663   | 0.040                  | 123 (91.79)   | 124 (92.54)   | 0.028 |
|                                    | Yes                  | 12 (7.45)       | 26 (6.44)       |         |                        | 11 (8.21)     | 10 (7.46)     |       |
| Pulmonary disease                  | No                   | 142 (88.2)      | 346 (85.64)     | 0.424   | 0.076                  | 116 (86.57)   | 118 (88.06)   | 0.045 |
|                                    | Yes                  | 19 (11.8)       | 58 (14.36)      |         |                        | 18 (13.43)    | 16 (11.94)    |       |
| Chronic kidney disease             | No                   | 149 (92.55)     | 371 (91.83)     | 0.777   | 0.027                  | 123 (91.79)   | 122 (91.04)   | 0.027 |
|                                    | Yes                  | 12 (7.45)       | 33 (8.17)       |         |                        | 11 (8.21)     | 12 (8.96)     |       |
| Cerebrovascular disease            | No                   | 144 (89.44)     | 378 (93.56)     | 0.095   | 0.148                  | 120 (89.55)   | 122 (91.04)   | 0.050 |
|                                    | Yes                  | 17 (10.56)      | 2 (66.44)       |         |                        | 14 (10.45)    | 12 (8.96)     |       |
| Hematologic disease                | No                   | 150 (93.17)     | 342 (84.65)     | 0.007   | 0.274                  | 123 (91.79)   | 126 (94.03)   | 0.087 |
|                                    | Yes                  | 11 (6.83)       | 62 (15.35)      |         |                        | 11 (8.21)     | 8 (5.97)      |       |
| Chronic liver disease              | No                   | 131 (81.37)     | 361 (89.36)     | 0.011   | 0.228                  | 116 (86.57)   | 113 (84.33)   | 0.064 |
|                                    | Yes                  | 30 (18.63)      | 43 (10.64)      |         |                        | 18 (13.43)    | 21 (15.67)    |       |
| Post-transplant state              | No                   | 157 (97.52)     | 359 (88.86)     | 0.001   | 0.349                  | 130 (97.01)   | 128 (95.52)   | 0.079 |
|                                    | Yes                  | 4 (2.48)        | 45 (11.14)      |         |                        | 4 (2.99)      | 6 (4.48)      |       |
| GCS score                          |                      | 4 (2-9)         | 2 (2-9)         | 0.788   | 0.026                  | 4 (2-9)       | 3 (2-14)      | 0.042 |
| SOFA score                         |                      | 11.081 ± 3.679  | 11.366 ± 3.798  | 0.416   | 0.076                  | 11.01 ± 3.69  | 10.93 ± 3.63  | 0.025 |
| Community-acquired pneumonia       | No                   | 135 (83.85)     | 330 (81.68)     | 0.542   | 0.057                  | 110 (82.09)   | 112 (83.58)   | 0.040 |
|                                    | Yes                  | 26 (16.15)      | 74 (18.32)      |         |                        | 24 (17.91)    | 22 (16.42)    |       |
| Healthcare-associated pneumonia    | No                   | 133 (82.61)     | 285 (70.54)     | 0.003   | 0.288                  | 111 (82.84)   | 111 (82.84)   | 0.000 |
|                                    | Yes                  | 28 (17.39)      | 119 (29.46)     |         |                        | 23 (17.16)    | 23 (17.16)    |       |
| Hospital-acquired pneumonia        | No                   | 129 (80.12)     | 336 (83.17)     | 0.392   | 0.079                  | 111 (82.84)   | 109 (81.34)   | 0.039 |
|                                    | Yes                  | 32 (19.88)      | 68 (16.83)      |         |                        | 23 (17.16)    | 25 (18.66)    |       |
| Aspiration                         | No                   | 138 (85.71)     | 371 (91.83)     | 0.028   | 0.195                  | 117 (87.31)   | 114 (85.07)   | 0.065 |
|                                    | Yes                  | 23 (14.29)      | 33 (8.17)       |         |                        | 17 (12.69)    | 20 (14.93)    |       |
| Others                             | No                   | 156 (96.89)     | 374 (92.57)     | 0.055   | 0.194                  | 129 (96.27)   | 128 (95.52)   | 0.038 |
|                                    | Yes                  | 5 (3.11)        | 30 (7.43)       |         |                        | 5 (3.73)      | 6 (4.48)      |       |
| Sepsis                             | No                   | 134 (83.23)     | 342 (84.65)     | 0.675   | 0.039                  | 109 (81.34)   | 107 (79.85)   | 0.038 |
|                                    | Yes                  | 27 (16.77)      | 62 (15.35)      |         |                        | 25 (18.66)    | 27 (20.15)    |       |
| Non-sepsis                         | No                   | 147 (91.3)      | 387 (95.79)     | 0.035   | 0.183                  | 122 (91.04)   | 125 (93.28)   | 0.083 |
|                                    | Yes                  | 14 (8.7)        | 17 (4.21)       |         |                        | 12 (8.96)     | 9 (6.72)      |       |

Values are presented as number (%), mean ± SD, or median (interquartile range). Categorical variables: chi-square test or Fisher's exact test (discrimination: c-statistics = 0.792; calibration: Hosmer-Lemeshow statistics p value = 0.1580). Continuous variables: Student's *t* test.

SDM, standardized difference of the mean; GCS, Glasgow Coma Scale; SOFA, Sequential Organ Failure Assessment.
